# Supplementary material for: Determination of thallium isotopic composition through MC-ICP-MS with mass bias corrected using admixed W
Source: Royal Society of Chemistry journal article supplement (doi:10.1039/d4ja00187g), 2024-01-01
Supplement: d4ja00187g1.pdf [file d4ja00187g1.pdf]

## Supporting information

| Mass         | Oxide ions                                               | Argide ions                                              | Nitride ions                                             | Nitrogen monoxide ions                                                   |
|--------------|----------------------------------------------------------|----------------------------------------------------------|----------------------------------------------------------|--------------------------------------------------------------------------|
| <b>186W</b>  | <sup>170</sup> Er <sup>16</sup> O <sup>+</sup> (14.93%); | <sup>146</sup> Nd <sup>40</sup> Ar <sup>+</sup> (17.2%)  | <sup>172</sup> Yb <sup>14</sup> N <sup>+</sup> (21.83%)  | <sup>156</sup> Gd <sup>14</sup> N <sup>16</sup> O <sup>+</sup> (20.47%)  |
|              | <sup>170</sup> Yb <sup>16</sup> O <sup>+</sup> (3.04%);  |                                                          |                                                          | <sup>156</sup> Dy <sup>14</sup> N <sup>16</sup> O <sup>+</sup> (0.06%);  |
| <b>184W</b>  | <sup>168</sup> Er <sup>16</sup> O <sup>+</sup> (26.78%); | <sup>144</sup> Nd <sup>40</sup> Ar <sup>+</sup> (23.8%); | <sup>170</sup> Er <sup>14</sup> N <sup>+</sup> (14.93%); | <sup>154</sup> Sm <sup>14</sup> N <sup>16</sup> O <sup>+</sup> (22.75%); |
|              | <sup>168</sup> Yb <sup>16</sup> O <sup>+</sup> (0.13%);  | <sup>144</sup> Sm <sup>40</sup> Ar <sup>+</sup> (3.07%)  | <sup>170</sup> Yb <sup>14</sup> N <sup>+</sup> (3.04%)   | <sup>154</sup> Gd <sup>14</sup> N <sup>16</sup> O <sup>+</sup> (2.18%),  |
| <b>203Tl</b> | <sup>187</sup> Os <sup>16</sup> O <sup>+</sup> (13.24%); | <sup>163</sup> Dy <sup>40</sup> Ar <sup>+</sup> (24.9%)  | <sup>189</sup> Os <sup>14</sup> N <sup>+</sup> (16.15%)  | <sup>173</sup> Yb <sup>14</sup> N <sup>16</sup> O <sup>+</sup> (16.13%)  |
|              | <sup>187</sup> Re <sup>16</sup> O <sup>+</sup> (62.60%)  |                                                          |                                                          |                                                                          |
| <b>205Tl</b> | <sup>189</sup> Os <sup>16</sup> O <sup>+</sup> (16.15%)  | <sup>165</sup> Ho <sup>40</sup> Ar <sup>+</sup> (100%)   | <sup>191</sup> Ir <sup>14</sup> N <sup>+</sup> (37.3%)   | <sup>174</sup> Yb <sup>14</sup> N <sup>16</sup> O <sup>+</sup> (31.83%); |
|              |                                                          |                                                          |                                                          | <sup>174</sup> Hf <sup>14</sup> N <sup>16</sup> O <sup>+</sup> (0.16%)   |

Table S 1. The polyatomic interference during Tl isotope analysis. The relative abundances of isotopes are from Rosman and Taylor (1998) and shown as a percentage.

1. K. J. R. Rosman and P. D. P. Taylor, *Pure and Applied Chemistry*, 1998, **70**, 217-235.
